# Supplementary material for: Wnt Signaling Mediates the Aging-Induced Differentiation Impairment of Intestinal Stem Cells
Source: PubMed Central journal article supplement (PMC6534527; doi:10.1007/s12015-019-09880-9), 2019-02-21

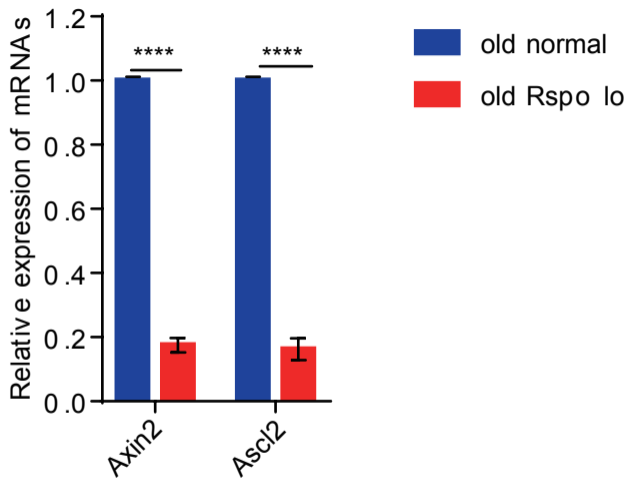

Supplement: 12015_2019_9880_MOESM2_ESM.pdf [file 12015_2019_9880_MOESM2_ESM.pdf]
